# Supplementary material
Source: PubMed Central journal article supplement (PMC6517080)
Supplement: NIHMS1025568-supplement-1.pdf [file NIHMS1025568-supplement-1.pdf]

# CHEMBIOCHEM

## Supporting Information

### **Recognition and Conformational Properties of an Alternative Antithrombin Binding Sequence Obtained by Chemoenzymatic Synthesis**

Eduardo Stancanelli<sup>+</sup>,<sup>[a]</sup> Stefano Elli<sup>+</sup>,<sup>[a]</sup> Po-Hung Hsieh,<sup>[b]</sup> Jian Liu,<sup>[b]</sup> and Marco Guerrini<sup>\*[a]</sup>

cbic\_201800095\_sm\_miscellaneous\_information.pdf

| Glycosidic dihedral angles of Hexa-4/AT complex |                      |                    |                      |                    |                      |          |
|-------------------------------------------------|----------------------|--------------------|----------------------|--------------------|----------------------|----------|
| tr-NOE select. Struct. (ns)                     | GlcNS6S-GlcA         | GlcA-GlcNS3S6S     | GlcNS3S6S-IdoA2S     | IdoA2S-GlcNS6S     | GlcNS6S''-GlcA''     | Rave     |
| 209                                             | -50/-37              | 47/24              | -69/-54              | 53/19              | -24/-18              | 0.13     |
| 227                                             | -39/-33              | 53/22              | -47/-58              | 51/19              | -23/-30              | 0.09     |
| 240                                             | -59/-38              | 45/27              | -51/-56              | 39/21              | -16/-17              | 0.22     |
| 257                                             | -45/-40              | 50/25              | -62/-39              | 48/24              | -14/-28              | 0.17     |
| 270                                             | -43/-31              | 39/44              | -59/-52              | 70/12              | -26/-25              | 0.19     |
| <b>AVERAGE</b>                                  | <b>-47(3)/-36(2)</b> | <b>47(2)/28(4)</b> | <b>-58(4)/-52(4)</b> | <b>52(5)/19(2)</b> | <b>-21(2)/-24(4)</b> | <b>-</b> |
| <b>Hexa-4</b>                                   | <b>-41(2)/-27(1)</b> | <b>53(1)/5(1)</b>  | <b>-41(1)/-45(1)</b> | <b>45(1)/1(1)</b>  | <b>-42(1)/-20(1)</b> | <b>-</b> |
| Glycosidic dihedral angles of Hexa-8/AT complex |                      |                    |                      |                    |                      |          |
| tr-NOE select. Struct. (ns)                     | GlcNS6S-GlcA         | GlcA-GlcNS3S6S     | GlcNS3S6S-IdoA2S     | IdoA2S-GlcNS6S     | GlcNS6S''-GlcA''     | Rave     |
| 214                                             | -41/-33              | 50/8               | -44/-40              | 45/11              | -69/-46              | 0.20     |
| 235                                             | -16/-28              | 44/6               | -57/-40              | 45/23              | -63/-37              | 0.18     |
| 243                                             | -23/-24              | 47/4               | -56/-47              | 54/21              | -70/-48              | 0.21     |
| 258                                             | -37/-1               | 38/8               | -62/-50              | 56/9               | -85/-34              | 0.18     |
| <b>AVERAGE</b>                                  | <b>-29(6)/-22(7)</b> | <b>45(3)/7(1)</b>  | <b>-55(4)/-44(3)</b> | <b>50(3)/16(4)</b> | <b>-72(5)/-41(3)</b> | <b>-</b> |
| <b>Hexa-8</b>                                   | <b>-42(1)/-23(1)</b> | <b>59(1)/8(1)</b>  | <b>-46(1)/-41(1)</b> | <b>33(1)/11(2)</b> | <b>-47(2)/-28(2)</b> | <b>-</b> |
| (Hricovini et al 2001)                          |                      |                    |                      |                    |                      |          |
| <b>AGA*IA/AT</b>                                | <b>-56/-60</b>       | <b>40/12</b>       | <b>-32/-43</b>       | <b>45/16</b>       | <b>-</b>             | <b>-</b> |
| <b>AGA*IA</b>                                   | <b>-34/-27</b>       | <b>47/6</b>        | <b>-35/-42</b>       | <b>43/6</b>        | <b>-</b>             | <b>-</b> |

**Table S1** Glycosidic dihedral angles ( $\phi/\psi$ ) of Hexa/AT complexes generated by MD simulation and validated by selected Tr-NOEs, corresponding to geometries at instant time: 209, 227, 240, 257, 270 ns for Hexa-4/AT and 214, 235, 243, 258 ns for Hexa-8/AT. The last column (Rave) report the R factor averaged on the selected set of proton-proton inter-glycosidic Tr-NOEs used as constraints. The label "AVERAGE" (light blue background) indicate the average and estimated error calculated on the respective set of glycosidic dihedral angles. Glycosidic dihedral angles of Hexa-4 and Hexa-8 in free state are reported as averages and errors calculated on the MD simulation trajectories after 40ns of relaxation time (Hexa-4 and Hexa-8 labels in orange background). The corresponding dihedral angles  $\phi/\psi$  of the AGA\*IA and AGA\*IA/AT complexes as determined by Hricovini et al. 2001 are reported in the last two rows in orange and light blue background.

|                  | Hexa-4 and Hexa-4/AT |                   | Hexa-8 and Hexa-8/AT |                   |
|------------------|----------------------|-------------------|----------------------|-------------------|
|                  | H2-H5/H4-H5          | H2-H5/H4-H5       | H2-H5/H4-H5          | H2-H5/H4-H5       |
| Mixing time (ms) | NOE                  | tr-NOE            | NOE                  | tr-NOE            |
| 200              | 2.2/4.9 (=0.45)      | 19.9/15.6 (=1.28) | 0.9/3.4 (=0.26)      | 5.1/5.7 (=0.89)   |
| 300              | 2.8/7.8 (=0.36)      | 29.8/24.2 (=1.23) | 1.7/5.6 (=0.30)      | 7.4/9.4 (=0.79)   |
| 500              | 5.2/12.4 (=0.42)     | 51.8/44.4 (=1.17) | 2.2/10.0 (=0.22)     | 15.5/18.5 (=0.84) |

**Table S2** Selected H2-H5 and H4-H5 intra-residue NOEs and Tr-NOEs for IdoA in Hexa-4 and Hexa-8 in free and in bound state with AT, respectively. The ratios between the two signals are reported in red in brackets.

| Hexa-4 Experimental NOE (Simulated NOE) |              |                         |                       |                       |
|-----------------------------------------|--------------|-------------------------|-----------------------|-----------------------|
| Tmix                                    | GlcNS6S-GlcA | GlcNS3S6S-IdoA2S        | IdoA2S-GlcNS6S''      | GlcNS6S''-GlcA''      |
| (ms)                                    | H1-H4        | H1-H4/H1-H3             | H1-H4/H1-H6           | H1-H4/H1-H3           |
| 200                                     | 2.9 (2.8)    | (4.1) 4.3/4.0 (3.4)     | (8.8) 3.2/3.4 (2.5)   | (6.1) 2.3/0.7 (0.50)  |
| 300                                     | 4.5 (5.1)    | (6.2) 6.2/6.1 (5.2)     | (13.2) 4.9/5.2 (4.0)  | (9.2) 3.7/1.1 (0.81)  |
| 500                                     | 7.9 (8.6)    | (10.3) 10.5/10.2 (8.7)  | (22.0) 8.0/7.8 (7.8)  | (15.3) 6.0/1.9 (1.42) |
| Hexa-8 Experimental NOE (Simulated NOE) |              |                         |                       |                       |
| Tmix                                    | GlcNS6S-GlcA | GlcNS3S6S-IdoA          | IdoA-GlcNS6S''        | GlcNS6S''-GlcA''      |
| (ms)                                    | H1-H4        | H1-H4/H1-H3             | H1-H4/H1-H6           | H1-H4/H1-H3           |
| 200                                     | 2.1 (6.3)    | (3.9) 5.4/6.7 (9.5)     | (11.4) 4.0/1.6 (2.1)  | (4.3) 1.4/0.1 (0.9)   |
| 300                                     | 3.5 (9.4)    | (5.9) 8.0/10.2 (14.3)   | (17.1) 6.4/2.2 (3.5)  | (6.4) 2.2/0.4 (1.3)   |
| 500                                     | 5.8 (15.7)   | (10.1) 13.2/16.7 (23.9) | (28.4) 10.5/3.6 (6.9) | (10.8) 4.0/0.7 (2.2)  |

**Table S3.** Experimental NOEs of Hexa-4 and Hexa-8 in solution for selected Inter-glycosidic proton-proton correlation. The corresponding simulated NOEs are reported in brackets (red color), and are generated using NOEPROM, with an isotropic model of motion ( $T_c = 700$  ps). The Hexa-4 and Hexa-8 structure and conformations are obtained from MD simulation, adjusting each  $\phi_i/\psi_i$  glycosidic dihedral angle pair with the average values calculated as reported in materials and methods.

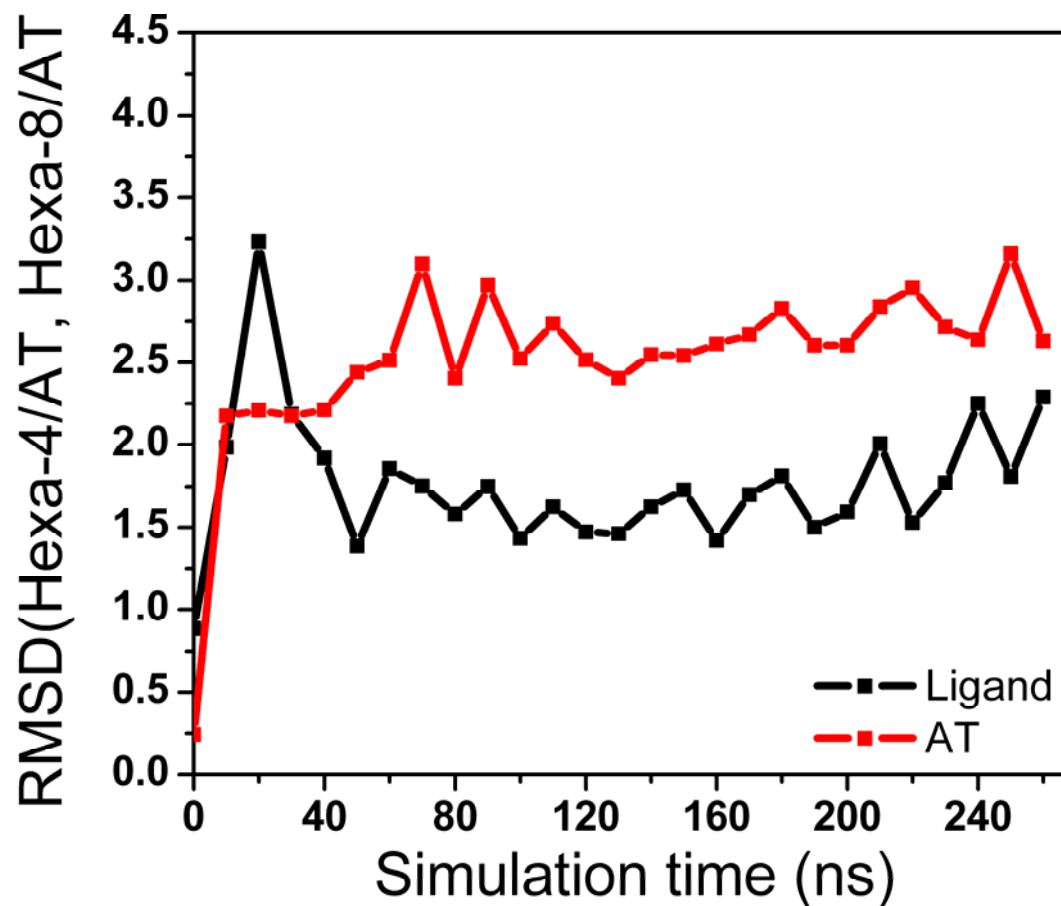

**Figure S1** The black line show the RMSD distance calculated between the two ligands (C1, C2, C3, C4, C5, O5 for each residue) after superposition of the A-helix ( $C\alpha$  backbone) in glycan-AT structures, for simulation time 0 to 260 ns. The red line correspond to the RMDS distance between AT of the two complexes calculated on the  $C\alpha$  backbone. Plotting the RMSD between Hexa-4 and Hexa-8 at different simulation time, it is possible to draw a time scale in which the ligand relative position in AT RBS change, giving an estimation of the MD relaxation time. All the distances are expressed in Å

|          | H1-H2 Hexa-4/AT time = 209ns |             |             | H1-H2 Hexa-4/AT time = 227ns |             |             | H1-H2 Hexa-4/AT time = 240ns |             |             |
|----------|------------------------------|-------------|-------------|------------------------------|-------------|-------------|------------------------------|-------------|-------------|
| Tmix ms  | GlcNS6S                      | GlcNS3S6S   | GlcNS6S''   | GlcNS6S                      | GlcNS3S6S   | GlcNS6S''   | GlcNS6S                      | GlcNS3S6S   | GlcNS6S''   |
| 200      | 15.4 (11.5)                  | 12.3 (17.7) | 9.4 (14.6)  | 15.4 (10.9)                  | 12.3 (10.6) | 9.4 (10.0)  | 15.4 (6.1)                   | 12.3 (10.1) | 9.4 (5.7)   |
| 300      | 22.4 (17.3)                  | 17.2 (25.8) | 21.3 (14.1) | 22.4 (16.1)                  | 17.2 (15.6) | 21.3 (14.5) | 22.4 (8.7)                   | 17.2 (14.5) | 21.3 (8.1)  |
| 500      | 38.0 (30.3)                  | 34.9 (42.1) | 33.1 (24.3) | 38.0 (27.1)                  | 34.9 (26.5) | 33.1 (23.4) | 38.0 (14.1)                  | 34.9 (23.4) | 33.1 (12.8) |
| <b>R</b> | <b>0.05</b>                  | <b>0.09</b> | <b>0.09</b> | <b>0.08</b>                  | <b>0.05</b> | <b>0.09</b> | <b>0.39</b>                  | <b>0.09</b> | <b>0.38</b> |

|          | H1-H2 Hexa-4/AT time = 257ns |             |             | H1-H2 Hexa-4/AT time = 270ns |             |             |
|----------|------------------------------|-------------|-------------|------------------------------|-------------|-------------|
| Tmix ms  | GlcNS6S                      | GlcNS3S6S   | GlcNS6S''   | GlcNS6S                      | GlcNS3S6S   | GlcNS6S''   |
| 200      | 15.4 (11.6)                  | 12.3 (9.8)  | 9.4 (6.7)   | 15.4 (13.2)                  | 12.3 (10.3) | 9.4 (6.3)   |
| 300      | 22.4 (16.1)                  | 17.2 (14.3) | 21.3 (9.6)  | 22.4 (19.1)                  | 17.2 (15.1) | 21.3 (9.4)  |
| 500      | 38.0 (25.1)                  | 34.9 (23.8) | 33.1 (15.9) | 38.0 (31.2)                  | 34.9 (25.2) | 33.1 (16.0) |
| <b>R</b> | <b>0.10</b>                  | <b>0.08</b> | <b>0.28</b> | <b>0.03</b>                  | <b>0.06</b> | <b>0.28</b> |

|          | H1-H2 Hexa-8/AT time = 214ns |             |             | H1-H2 Hexa-4/AT time = 235ns |             |             | H1-H2 Hexa-4/AT time = 243ns |             |             |
|----------|------------------------------|-------------|-------------|------------------------------|-------------|-------------|------------------------------|-------------|-------------|
| Tmix ms  | GlcNS6S                      | GlcNS3S6S   | GlcNS6S''   | GlcNS6S                      | GlcNS3S6S   | GlcNS6S''   | GlcNS6S                      | GlcNS3S6S   | GlcNS6S''   |
| 200      | 9.2 (10.0)                   | 8.2 (9.0)   | 8.5 (9.3)   | 9.2 (5.7)                    | 8.2 (6.8)   | 8.5 (6.1)   | 9.2 (7.2)                    | 8.2 (8.1)   | 8.5 (8.1)   |
| 300      | 15.7 (13.2)                  | 12.0 (12.6) | 13.1 (12.7) | 15.7 (7.9)                   | 12.0 (9.6)  | 13.1 (8.8)  | 15.7 (9.9)                   | 12.0 (11.5) | 13.1 (11.5) |
| 500      | 31.5 (18.6)                  | 22.8 (19.8) | 25.0 (18.6) | 31.5 (12.5)                  | 22.8 (15.4) | 25.0 (14.1) | 31.5 (15.0)                  | 22.8 (18.4) | 25.0 (17.9) |
| <b>R</b> | <b>0.13</b>                  | <b>0.01</b> | <b>0.05</b> | <b>0.33</b>                  | <b>0.09</b> | <b>0.16</b> | <b>0.23</b>                  | <b>0.03</b> | <b>0.06</b> |

|          | H1-H2 Hexa-8/AT time = 258ns |             |             |
|----------|------------------------------|-------------|-------------|
| Tmix ms  | GlcNS6S                      | GlcNS3S6S   | GlcNS6S''   |
| 200      | 9.2 (11.7)                   | 8.2 (6.6)   | 8.5 (6.8)   |
| 300      | 15.7 (17.0)                  | 12.0 (9.5)  | 13.1 (10.1) |
| 500      | 31.5 (28.5)                  | 22.8 (15.9) | 25.0 (17.6) |
| <b>R</b> | <b>0.13</b>                  | <b>0.01</b> | <b>0.05</b> |

**Table S4** Experimental H1-H2 intra-residue Tr-NOEs of the glucosamines: GlcNS6S, GlcNS3S6S, and GlcNS6S belonging to Hexa-4 and Hexa-8 in bound state with AT. The corresponding simulated tr-NOEs using the selected structures of Hexa-4/AT (209, 227, 240, 257, 270 ns) and Hexa-8/AT (214, 235, 243, 258 ns) are reported in brackets (see material and methods). The agreement between each experimental and simulated proton-proton Tr-NOE pairs is expressed by the R factor calculated considering three different mixing times.

| <b>Hexa-4/AT time = 209ns (simulated tr-NOEs are in brackets), Rave = 0.14</b> |                     |                           |             |                           |             |                         |             |
|--------------------------------------------------------------------------------|---------------------|---------------------------|-------------|---------------------------|-------------|-------------------------|-------------|
| <b>Tmix</b>                                                                    | <b>GlcNS6S-GlcA</b> | <b>GlcNS3S6S-IdoA(2S)</b> |             | <b>IdoA(2S)-GlcNS6S''</b> |             | <b>GlcNS6S''-GlcA''</b> |             |
| <b>(ms)</b>                                                                    | H1-H4               | H1-H4                     | H1-H3       | H1-H4                     | H1-H6       | H1-H4                   | H1-H3       |
| <b>200</b>                                                                     | 14.9 (6.5)          | 15 (4.5)                  | 13.9 (13.0) | 9.8 (7.5)                 | 10.4 (10.6) | 16.2 (23.5)             | 5.7 (3.7)   |
| <b>300</b>                                                                     | 22 (10.4)           | 25.5 (7.3)                | 23.4 (19.2) | 13.3 (11.5)               | 15.1 (15.8) | 25.1 (34.2)             | 10.1 (6.4)  |
| <b>500</b>                                                                     | 41.5 (20.3)         | 34.9 (15.0)               | 32.3 (32.3) | 24.1 (20.5)               | 29.8 (26.8) | 43.3 (56.0)             | 24.4 (13.9) |
| <b>R</b>                                                                       | <b>0.27</b>         | <b>0.40</b>               | <b>0.01</b> | <b>0.03</b>               | <b>0.01</b> | <b>0.11</b>             | <b>0.18</b> |
| <b>Hexa-4/AT time = 227ns, Rave = 0.10</b>                                     |                     |                           |             |                           |             |                         |             |
| <b>200</b>                                                                     | 14.9 (10.5)         | 15 (5.3)                  | 13.9 (17.3) | 9.8 (10.0)                | 10.4 (9.2)  | 16.2 (20.3)             | 5.7 (5.1)   |
| <b>300</b>                                                                     | 22 (15.5)           | 25.5 (8.6)                | 23.4 (25.1) | 13.3 (14.5)               | 15.1 (13.5) | 25.1 (28.8)             | 10.1 (8.2)  |
| <b>500</b>                                                                     | 41.5 (26.2)         | 34.9 (16.9)               | 32.3 (41.0) | 24.1 (23.6)               | 29.8 (22.0) | 43.3 (44.7)             | 24.4 (16.0) |
| <b>R</b>                                                                       | <b>0.12</b>         | <b>0.34</b>               | <b>0.05</b> | <b>0.00</b>               | <b>0.05</b> | <b>0.01</b>             | <b>0.10</b> |
| <b>Hexa-4/AT time = 240ns, Rave = 0.22</b>                                     |                     |                           |             |                           |             |                         |             |
| <b>200</b>                                                                     | 14.9 (7.2)          | 15 (5.4)                  | 13.9 (7.5)  | 9.8 (12.7)                | 10.4 (7.5)  | 16.2 (13.5)             | 5.7 (3.5)   |
| <b>300</b>                                                                     | 22 (10.5)           | 25.5 (8.1)                | 23.4 (11.0) | 13.3 (16.6)               | 15.1 (10.3) | 25.1 (18.6)             | 10.1 (5.6)  |
| <b>500</b>                                                                     | 41.5 (17.5)         | 34.9 (14.3)               | 32.3 (18.8) | 24.1 (22.7)               | 29.8 (15.2) | 43.3 (28.3)             | 24.4 (10.9) |
| <b>R</b>                                                                       | <b>0.32</b>         | <b>0.39</b>               | <b>0.21</b> | <b>0.03</b>               | <b>0.20</b> | <b>0.10</b>             | <b>0.28</b> |
| <b>Hexa-4/AT time = 257ns, Rave = 0.18</b>                                     |                     |                           |             |                           |             |                         |             |
| <b>200</b>                                                                     | 14.9 (8.6)          | 15 (7.1)                  | 13.9 (13.3) | 9.8 (6.8)                 | 10.4 (10.1) | 16.2 (12.2)             | 5.7 (2.5)   |
| <b>300</b>                                                                     | 22 (12.7)           | 25.5 (10.4)               | 23.4 (11.4) | 13.3 (9.6)                | 15.1 (14.1) | 25.1 (17.9)             | 10.1 (4.2)  |
| <b>500</b>                                                                     | 41.5 (21.9)         | 34.9 (18.9)               | 32.3 (20.4) | 24.1 (15.4)               | 29.8 (21.7) | 43.3 (29.8)             | 24.4 (9.1)  |
| <b>R</b>                                                                       | <b>0.21</b>         | <b>0.26</b>               | <b>0.16</b> | <b>0.11</b>               | <b>0.05</b> | <b>0.09</b>             | <b>0.38</b> |
| <b>Hexa-4/AT time = 270ns, Rave = 0.18</b>                                     |                     |                           |             |                           |             |                         |             |
| <b>200</b>                                                                     | 14.9 (6.1)          | 15 (6.6)                  | 13.9 (15.9) | 9.8 (5.3)                 | 10.4 (11.5) | 16.2 (13.3)             | 5.7 (2.9)   |
| <b>300</b>                                                                     | 22 (9.2)            | 25.5 (10.2)               | 23.4 (22.6) | 13.3 (7.9)                | 15.1 (16.3) | 25.1 (19.4)             | 10.1 (5.0)  |
| <b>500</b>                                                                     | 41.5 (16.0)         | 34.9 (18.7)               | 32.3 (36.1) | 24.1 (13.6)               | 29.8 (25.3) | 43.3 (32.3)             | 24.4 (10.6) |
| <b>R</b>                                                                       | <b>0.37</b>         | <b>0.27</b>               | <b>0.01</b> | <b>0.19</b>               | <b>0.02</b> | <b>0.06</b>             | <b>0.31</b> |

Table S5 (a)

| <b>Hexa-8/AT time = 214ns (simulated tr-NOEs are in brackets), Rave = 0.24</b> |                     |                           |             |                           |             |                         |             |
|--------------------------------------------------------------------------------|---------------------|---------------------------|-------------|---------------------------|-------------|-------------------------|-------------|
| <b>Tmix</b>                                                                    | <b>GlcNS6S-GlcA</b> | <b>GlcNS3S6S-IdoA(2S)</b> |             | <b>IdoA(2S)-GlcNS6S''</b> |             | <b>GlcNS6S''-GlcA''</b> |             |
| <b>(ms)</b>                                                                    | H1-H4               | H1-H4                     | H1-H3       | H1-H4                     | H1-H6       | H1-H4                   | H1-H3       |
| <b>200</b>                                                                     | 5.9 (5.9)           | 8.6 (6.4)                 | 7.7 (4.4)   | 9.8 (6.2)                 | 4.8 (7.0)   | 6.1 (2.9)               | 1.3 (3.0)   |
| <b>300</b>                                                                     | 9.8 (8.1)           | 17.3 (7.4)                | 14.1 (10.5) | 15.3 (8.1)                | 6.6 (8.7)   | 11.0 (4.4)              | 2.1 (4.4)   |
| <b>500</b>                                                                     | 21.1 (12.5)         | 35.7 (12.1)               | 28.9 (17.0) | 32 (11.1)                 | 13.5 (10.9) | 24.7 (7.8)              | 7.7 (7.6)   |
| <b>R</b>                                                                       | <b>0.13</b>         | <b>0.40</b>               | <b>0.15</b> | <b>0.37</b>               | <b>0.07</b> | <b>0.44</b>             | <b>0.12</b> |
| <b>Hexa-8/AT time = 235ns, Rave = 0.24</b>                                     |                     |                           |             |                           |             |                         |             |
| <b>200</b>                                                                     | 5.9 (7.0)           | 8.6 (6.4)                 | 7.7 (10.4)  | 9.8 (7.8)                 | 4.8 (9.7)   | 6.1 (4.3)               | 1.3 (3.1)   |
| <b>300</b>                                                                     | 9.8 (9.8)           | 17.3 (9.3)                | 14.1 (14.7) | 15.3 (10.4)               | 6.6 (12.6)  | 11.0 (6.4)              | 2.1 (4.7)   |
| <b>500</b>                                                                     | 21.1 (15.2)         | 35.7 (15.7)               | 28.9 (23.6) | 32 (14.9)                 | 13.5 (17.1) | 24.7 (11.2)             | 7.7 (8.6)   |
| <b>R</b>                                                                       | <b>0.13</b>         | <b>0.40</b>               | <b>0.15</b> | <b>0.37</b>               | <b>0.07</b> | <b>0.44</b>             | <b>0.12</b> |
| <b>Hexa-8/AT time = 243ns, Rave = 0.27</b>                                     |                     |                           |             |                           |             |                         |             |
| <b>200</b>                                                                     | 5.9 (13.0)          | 8.6 (4.7)                 | 7.7 (11.0)  | 9.8 (6.5)                 | 4.8 (10.8)  | 6.1 (2.7)               | 1.3 (3.0)   |
| <b>300</b>                                                                     | 9.8 (17.1)          | 17.3 (7.0)                | 14.1 (15.6) | 15.3 (8.8)                | 6.6 (13.3)  | 11.0 (4.2)              | 2.1 (4.5)   |
| <b>500</b>                                                                     | 21.1 (23.4)         | 35.7 (12.3)               | 28.9 (25.0) | 32 (12.7)                 | 13.5 (16.7) | 24.7 (7.9)              | 7.7 (8.0)   |
| <b>R</b>                                                                       | <b>0.19</b>         | <b>0.41</b>               | <b>0.03</b> | <b>0.31</b>               | <b>0.36</b> | <b>0.44</b>             | <b>0.13</b> |
| <b>Hexa-8/AT time = 258ns, Rave = 0.22</b>                                     |                     |                           |             |                           |             |                         |             |
| <b>200</b>                                                                     | 5.9 (11.3)          | 8.6 (5.3)                 | 7.7 (15.9)  | 9.8 (7.3)                 | 4.8 (8.1)   | 6.1 (2.9)               | 1.3 (2.7)   |
| <b>300</b>                                                                     | 9.8 (16.0)          | 17.3 (8.1)                | 14.1 (22.4) | 15.3 (10.5)               | 6.6 (11.4)  | 11.0 (4.6)              | 2.1 (4.3)   |
| <b>500</b>                                                                     | 21.1 (25.5)         | 35.7 (14.9)               | 28.9 (35.1) | 32 (17.1)                 | 13.5 (18.1) | 24.7 (9.2)              | 7.7 (8.5)   |
| <b>R</b>                                                                       | <b>0.15</b>         | <b>0.32</b>               | <b>0.16</b> | <b>0.19</b>               | <b>0.22</b> | <b>0.38</b>             | <b>0.11</b> |

**Table S5 (b)**

**Table S5 (a) and (b)** Experimental selected inter-glycosidic Tr-NOEs signals measured for Hexa-4 and Hexa-8 in their interaction with AT. The corresponding simulated Tr-NOEs using the selected structures of Hexa-4/AT (209, 227, 240, 257, 270 ns) and Hexa-8/AT (214, 235, 243, 258 ns) are reported in brackets (see material and methods). The agreement between each experimental and simulated proton-proton Tr-NOE pairs is expressed by the R factor calculated at three different mixing times.



|                               | Residues        |             |             |             |             |             |
|-------------------------------|-----------------|-------------|-------------|-------------|-------------|-------------|
|                               | A-helix type CA | GlcNS6S     | GlcA        | GlcNS3S6S   | IdoA2S/IdoA | GlcNS6S''   |
| 1AZX                          | 0               | 0           | 0           | 0           | 0           | 0           |
| Hexa-4/AT, 209ns              | 0.53            | 1.63        | 1.92        | 1.62        | 0.99        | 0.44        |
| Hexa-4/AT, 227ns              | 0.48            | 1.85        | 2.2         | 2.13        | 1.3         | 0.47        |
| Hexa-4/AT, 240ns              | 0.41            | 1.67        | 2.13        | 1.88        | 1.18        | 0.73        |
| Hexa-4/AT, 257ns              | 0.39            | 1.77        | 1.92        | 1.79        | 1.08        | 0.48        |
| Hexa-4/AT, 270ns              | 0.47            | 2.28        | 2.58        | 2.46        | 1.61        | 1.18        |
| <b>RMSD ave (Hexa-4,1AZX)</b> | <b>0.46</b>     | <b>1.84</b> | <b>2.15</b> | <b>1.98</b> | <b>1.23</b> | <b>0.66</b> |
| Hexa-8/AT, 214ns              | 0.49            | 1.6         | 1.23        | 1.23        | 1.32        | 0.98        |
| Hexa-8/AT, 235ns              | 0.74            | 1.75        | 1.44        | 0.8         | 1.12        | 1.03        |
| Hexa-8/AT, 243ns              | 0.72            | 1.75        | 1.47        | 1.21        | 1.74        | 1.77        |
| Hexa-8/AT, 258ns              | 0.71            | 2.13        | 1.07        | 1.07        | 1.42        | 1.69        |
| <b>RMSD ave (Hexa-8,1AZX)</b> | <b>0.67</b>     | <b>1.81</b> | <b>1.30</b> | <b>1.08</b> | <b>1.40</b> | <b>1.37</b> |

**Table S6.** RMSD (Root Mean Square Distances) calculated between the common sequence of the active pentasaccharide co-crystallized with AT in PDB ID 1AZX, and the tested hexasaccharides in bound state with AT, which structures were validated by the tr-NOEs, and correspond to geometries at instant time: 209, 227, 240, 257, 270 ns for Hexa-4/AT and 214, 235, 243, 258 ns for Hexa-8/AT. In red average RMSD values are calculated for each glycan residue of Hexa-4/AT, and Hexa-8/AT complex respectively.

| Interacting groups                                                                     | Distances (Å) |                  |            |                  |                  |                  |
|----------------------------------------------------------------------------------------|---------------|------------------|------------|------------------|------------------|------------------|
|                                                                                        | Hexa-4/AT     | AGA*IA/AT<br>[1] | Hexa-8/AT  | AGA*IA/AT<br>[2] | AGA*IA/AT<br>[3] | AGA*IA/AT<br>[4] |
| GlcNS6S( <b>6S</b> )---R129(H <sub>2</sub> N- <b>C</b> -NH <sub>2</sub> <sup>+</sup> ) | <u>6.4</u>    | 4.3              | <u>8.3</u> | 4.9              | 5.2              | 5.0              |
| GlcNS6S( <b>6S</b> )---K125(H <sub>3</sub> <b>N</b> <sup>+</sup> )                     | 4.2           | <u>3.8</u>       | 5.7        | 4.4              | 4.8              | <u>6.2</u>       |
| GlcA( <b>COO</b> )---K125                                                              | <u>7.2</u>    | <u>3.5</u>       | 4.4        | 4.1              | 4.1              | <u>3.7</u>       |
| GlcNS3S6S( <b>NS</b> )---K114                                                          | 4.3           | -                | 4.6        | 4.3              | 4.1              | 4.5              |
| GlcNS3S6S( <b>3S</b> )---K114                                                          | 4.4           | -                | 4.2        | 4.1              | 4.1              | 4.4              |
| GlcNS3S6S( <b>NS</b> )---R13                                                           | 4.7           | -                | <u>6.7</u> | 5.4              | 5.6              | <u>8.2</u>       |
| IdoA2S( <b>COO</b> )---R47                                                             | 4.4           | 4.5              | 4.1        | 5.6              | 4.5              | 5.1              |
| IdoA2S( <b>COO</b> )---R46                                                             | 4.2           | -                | 4.0        | 5.7              | -                | <u>8.1</u>       |
| IdoA2S( <b>COO</b> )---K114                                                            | <u>3.5</u>    | <u>3.0</u>       | <u>3.6</u> | <u>3.6</u>       | <u>3.7</u>       | <u>3.4</u>       |
| IdoA2S( <b>SO3</b> <sup>-</sup> )---R13                                                | 4.4           | -                | /          | <u>8.7</u>       | 4.1              | <u>8.6</u>       |
| GlcNS6S''( <b>NS</b> )---R47                                                           | 4.0           | <u>3.9</u>       | 4.1        | 4.2              | 4.7              | 4.9              |
| GlcNS6S''( <b>NS</b> )---R46                                                           | 5.1           | 4.2              | 5.5        | 5.9              | -                | 5.9              |
| GlcNS6S''( <b>6S</b> )---K114                                                          | <u>7.8</u>    | 4.7              | <u>7.6</u> | 5.2              | 5.2              | 4.9              |
| GlcNS6S''( <b>6S</b> )---R13                                                           | 4.7           | -                | 4.6        | 8.4              | 5.3              | 5.4              |

**Tab. S7** Selected distances between interacting groups in Hexa-4/AT and Hexa-8/AT complexes at time 227 and 258 ns validated by tr-NOEs signals (see tr-NOEs/NOEs paragraph) are reported in 2<sup>nd</sup> and 4<sup>th</sup> column. The atoms used for distance definitions are underlined in bold face in the 1<sup>st</sup> column. For comparison the corresponding distances measured in AGA\*IA/AT complex in solution by NMR techniques (Hricovini et al. 2001) [1], by x-ray diffraction '1AZX' [2] (chain I Jin et al. 1997), '3kcg' [3] (Johnson, D.J. et al. 2010), and '2gd4' (Johnson, D.J. et al. 2006) are reported in 3<sup>rd</sup>, 5<sup>th</sup>, 6<sup>th</sup> and 7<sup>th</sup> column respectively. Distances greater than 6 Å and smaller than 4 Å are underlined in blue and red respectively. The symbol '-' indicate distances not reported. In 3kcg structure R46 residue were not accurately resolved.
